# Supplementary material
Source: PubMed Central journal article supplement (PMC8276873)

## SUPPLEMENTAL MATERIAL

### Table of Contents

- **Supplemental Table 1, Page 1 (legend) and attached Microsoft Excel spreadsheet.** List of LRT-EV proteins detected by our proteomic analysis.
- **Supplemental Figure 1, Page 1.** LRT-EV isolation methodology.

**Supplemental Table 1.** List of LRT-EV proteins detected by our proteomic analysis. This table is attached as a Microsoft Excel spreadsheet. Columns respectively indicate (left to right): UniProt/Swiss-Prot Accession/GenPept, protein symbol, Entrez Gene Name, cellular location, type(s), number of peptides, number of scans, and basic protein description.

**Supplemental Figure 1.** LRT-EV isolation methodology. LRT-EVs were isolated from rat urine through filtration and a series of centrifugation steps. Microscopy images illustrate the supernatant/pellet for various steps.

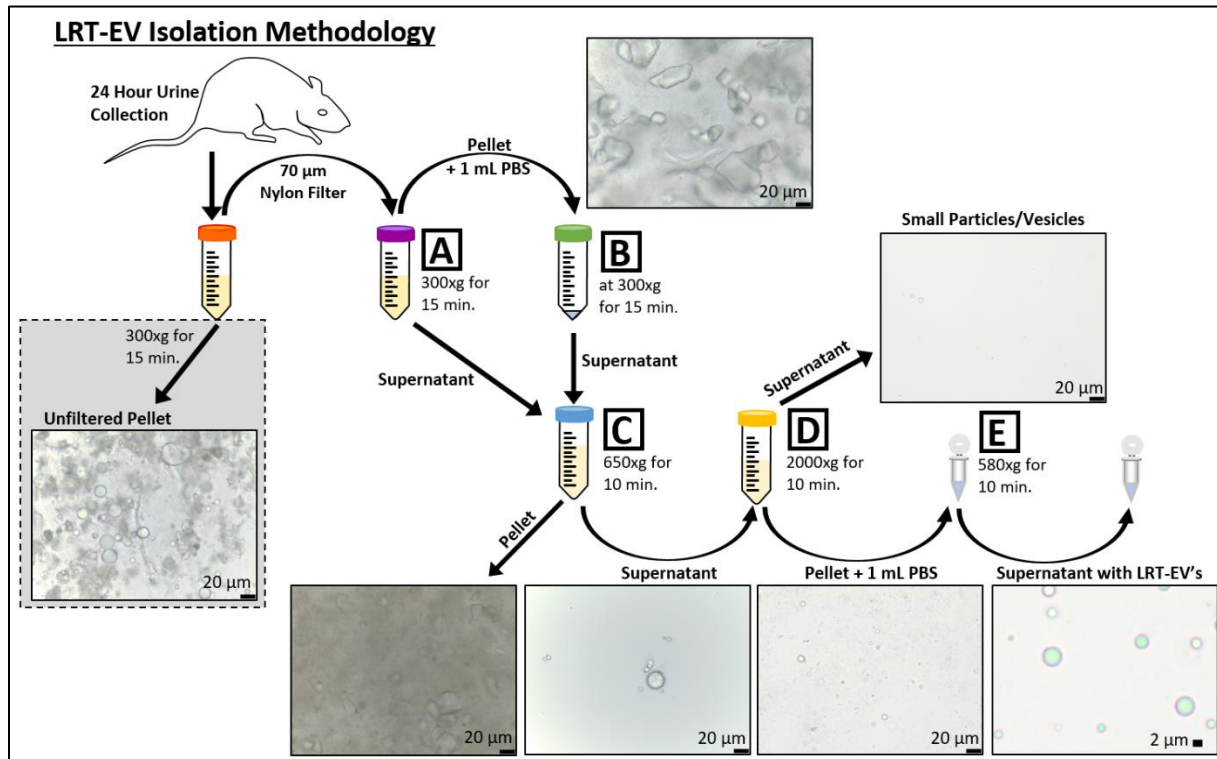

Supplement: NIHMS1655072-supplement-Supplemental_Material_Figure_1.pdf [file NIHMS1655072-supplement-Supplemental_Material_Figure_1.pdf]
